# Supplementary material
Source: PubMed Central journal article supplement (PMC9845752)
Supplement: develop-149-200982-s1.pdf [file develop-149-200982-s1.pdf]

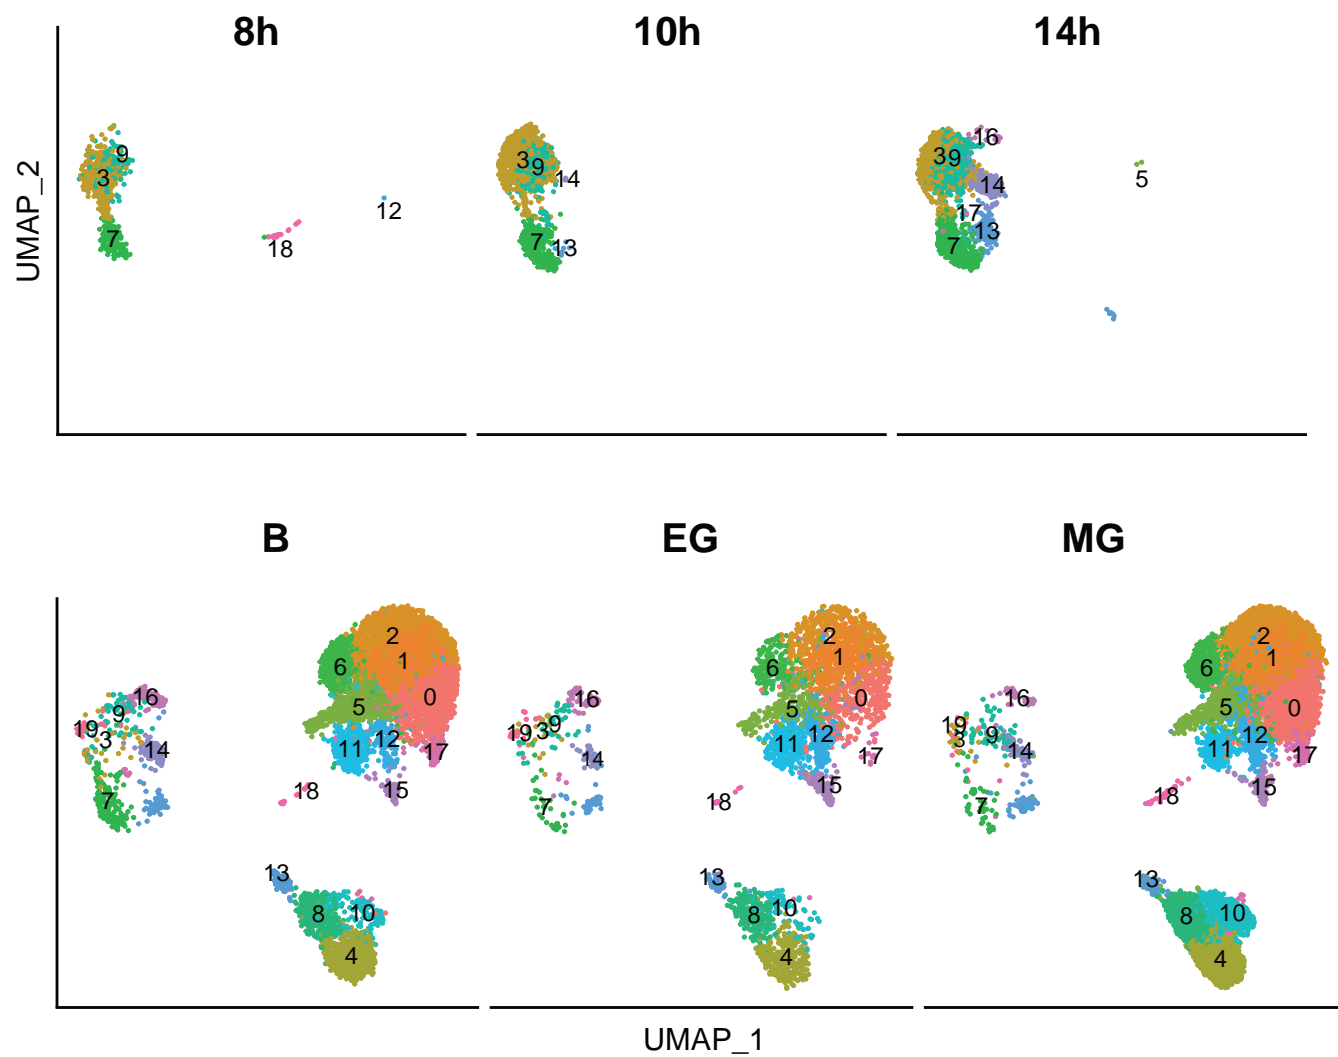

**Fig. S1. Identification of cell states across early sea star development.** UMAP visualization of six integrated datasets, separated by embryonic stage: 8-hpf (868 cells), 10-hpf (1,318 cells), 14-hpf (2,448 cells), blastula (7,272 cells), early gastrula (3,349 cells), and mid-gastrula (10,448 cells).

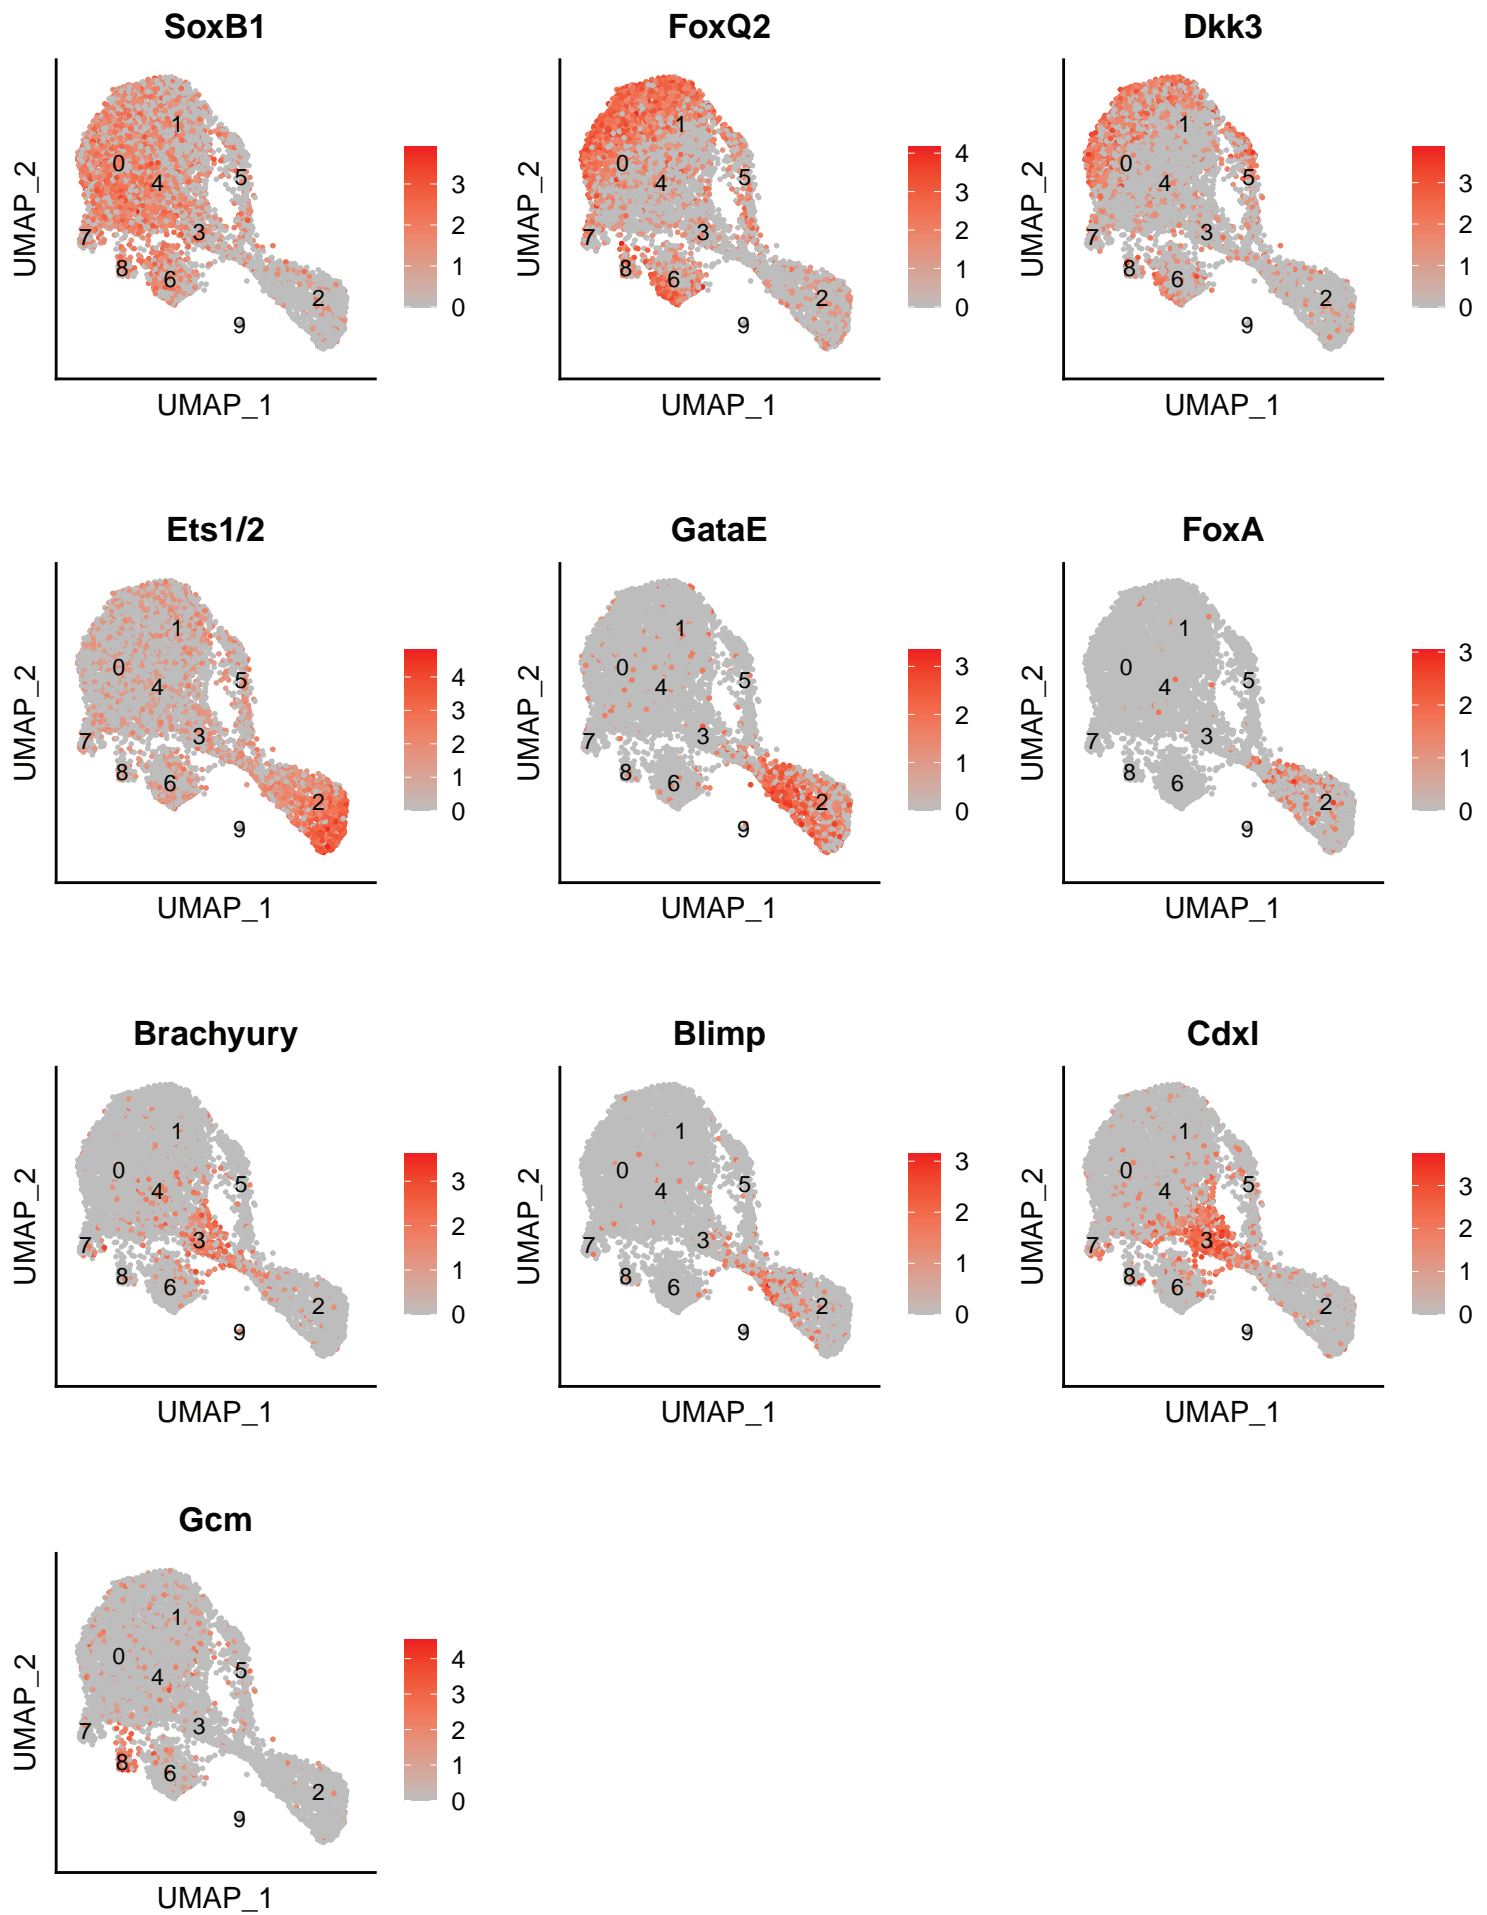

**Fig. S2. Marker gene expression at blastula stage.** Feature plots showing expression of ectodermal, mesodermal, and endodermal marker genes at blastula stage. Average gene expression level displayed by color intensity.



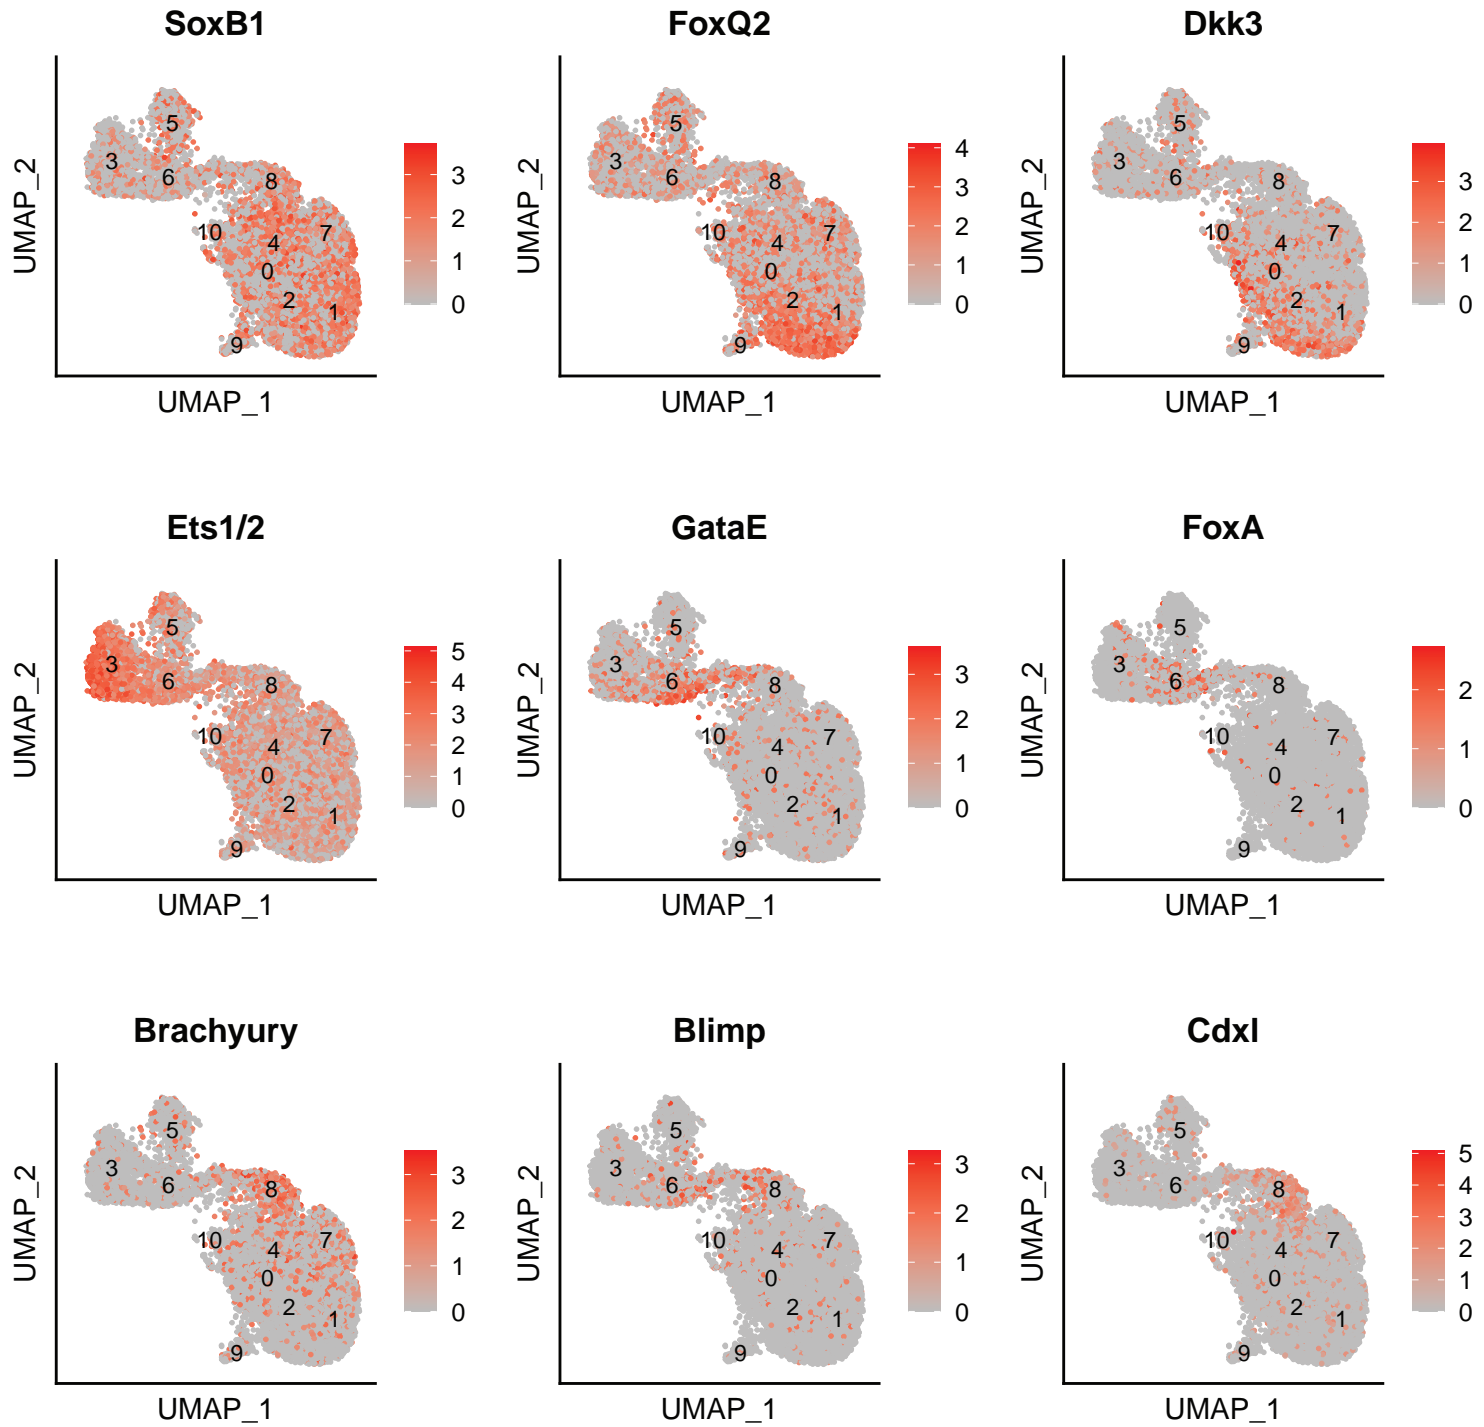

**Fig. S3. Marker gene expression at mid-gastrula stage.** Featureplots showing expression of ectodermal, mesodermal, and endodermal marker genes at mid-gastrula stage. Average gene expression level displayed by color intensity.

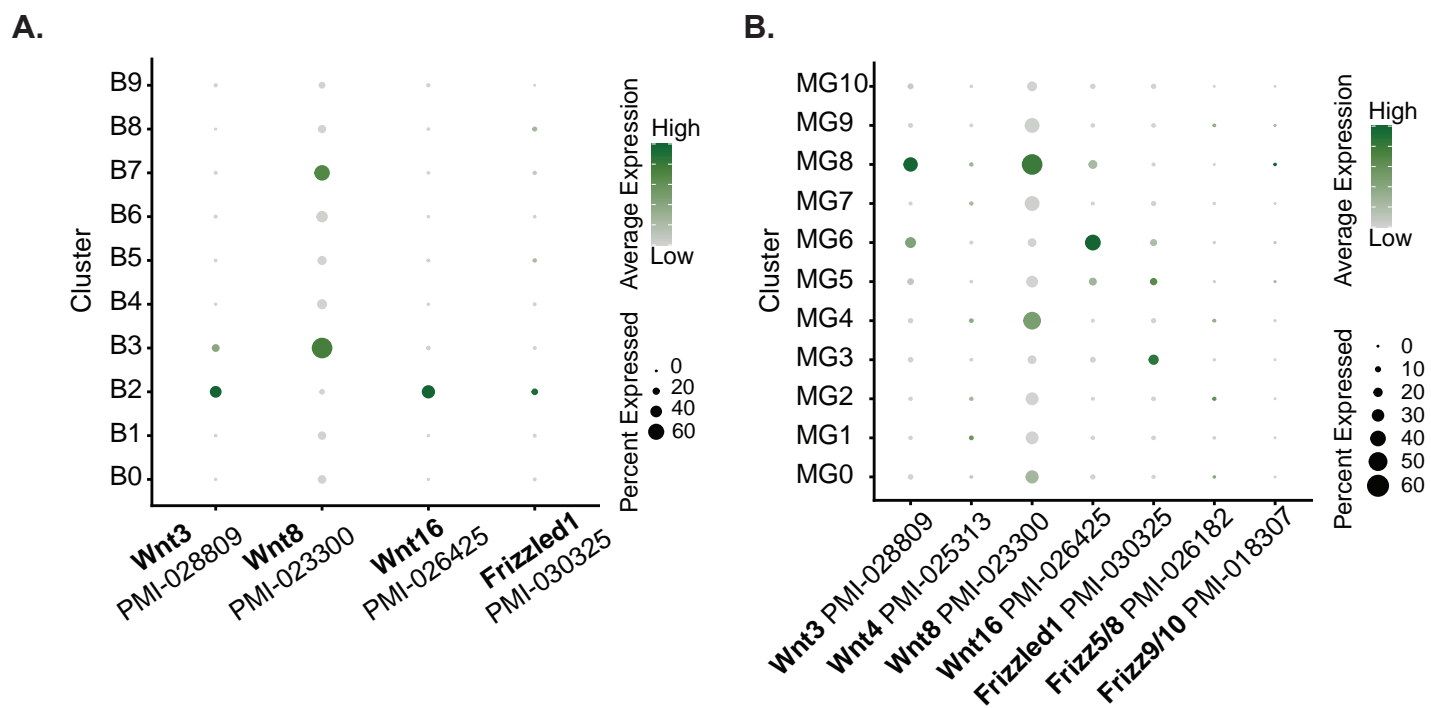

**Fig. S4. Wnt signaling component expression.** (A) Dot plot of Wnt signaling pathway component expression at blastula stage. Co-expression of Wnt3, Wnt16, and Frizzled1 receptor (Annotated as Frizz in the dataset) seen in cluster B2. (B) Dot plot of Wnt signaling pathway component expression at mid-gastrula stage.

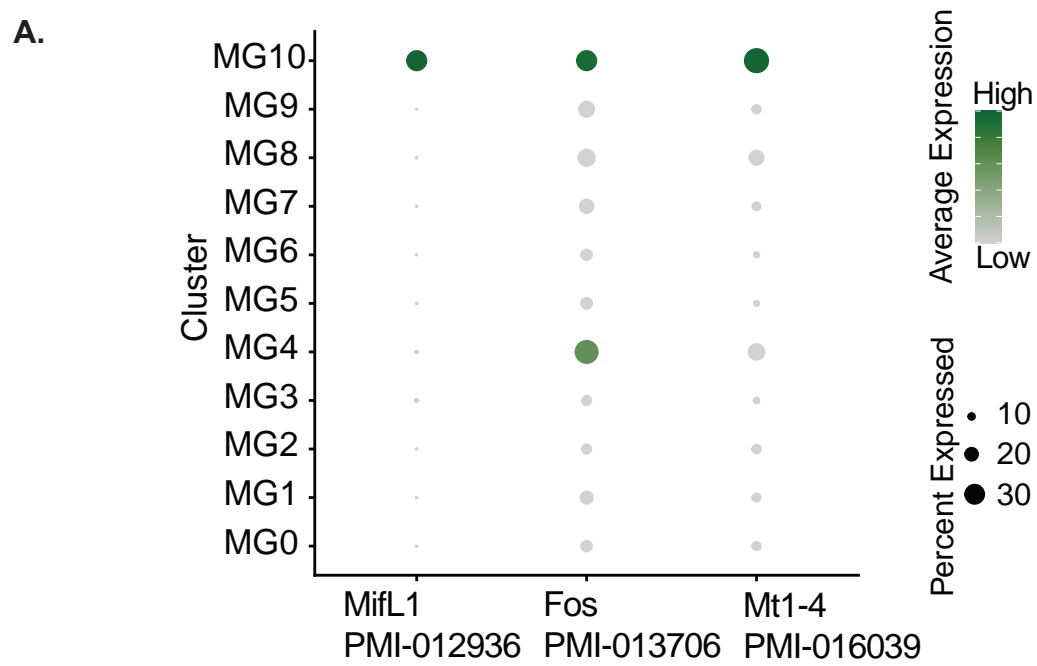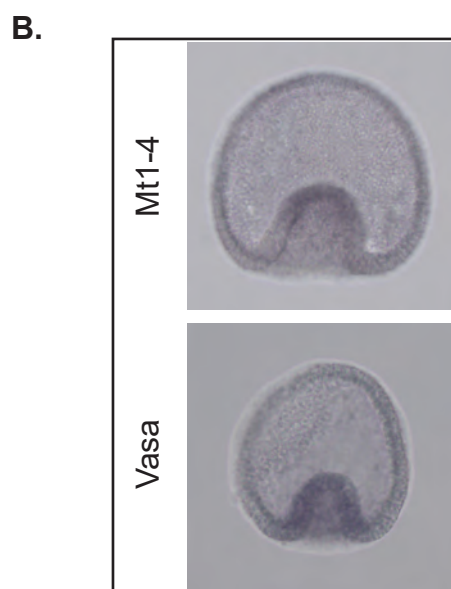

**Fig. S5. MifL1-enriched cluster expression.** (A) Dot plot showing expression of sea urchin PMC marker genes Mt1-4 and Fos in cluster 10, MifL1-enriched cluster, at mid-gastrula stage. (B) Whole mount in situ hybridizations for Mt1-4 and Vasa in sea star gastrulae.

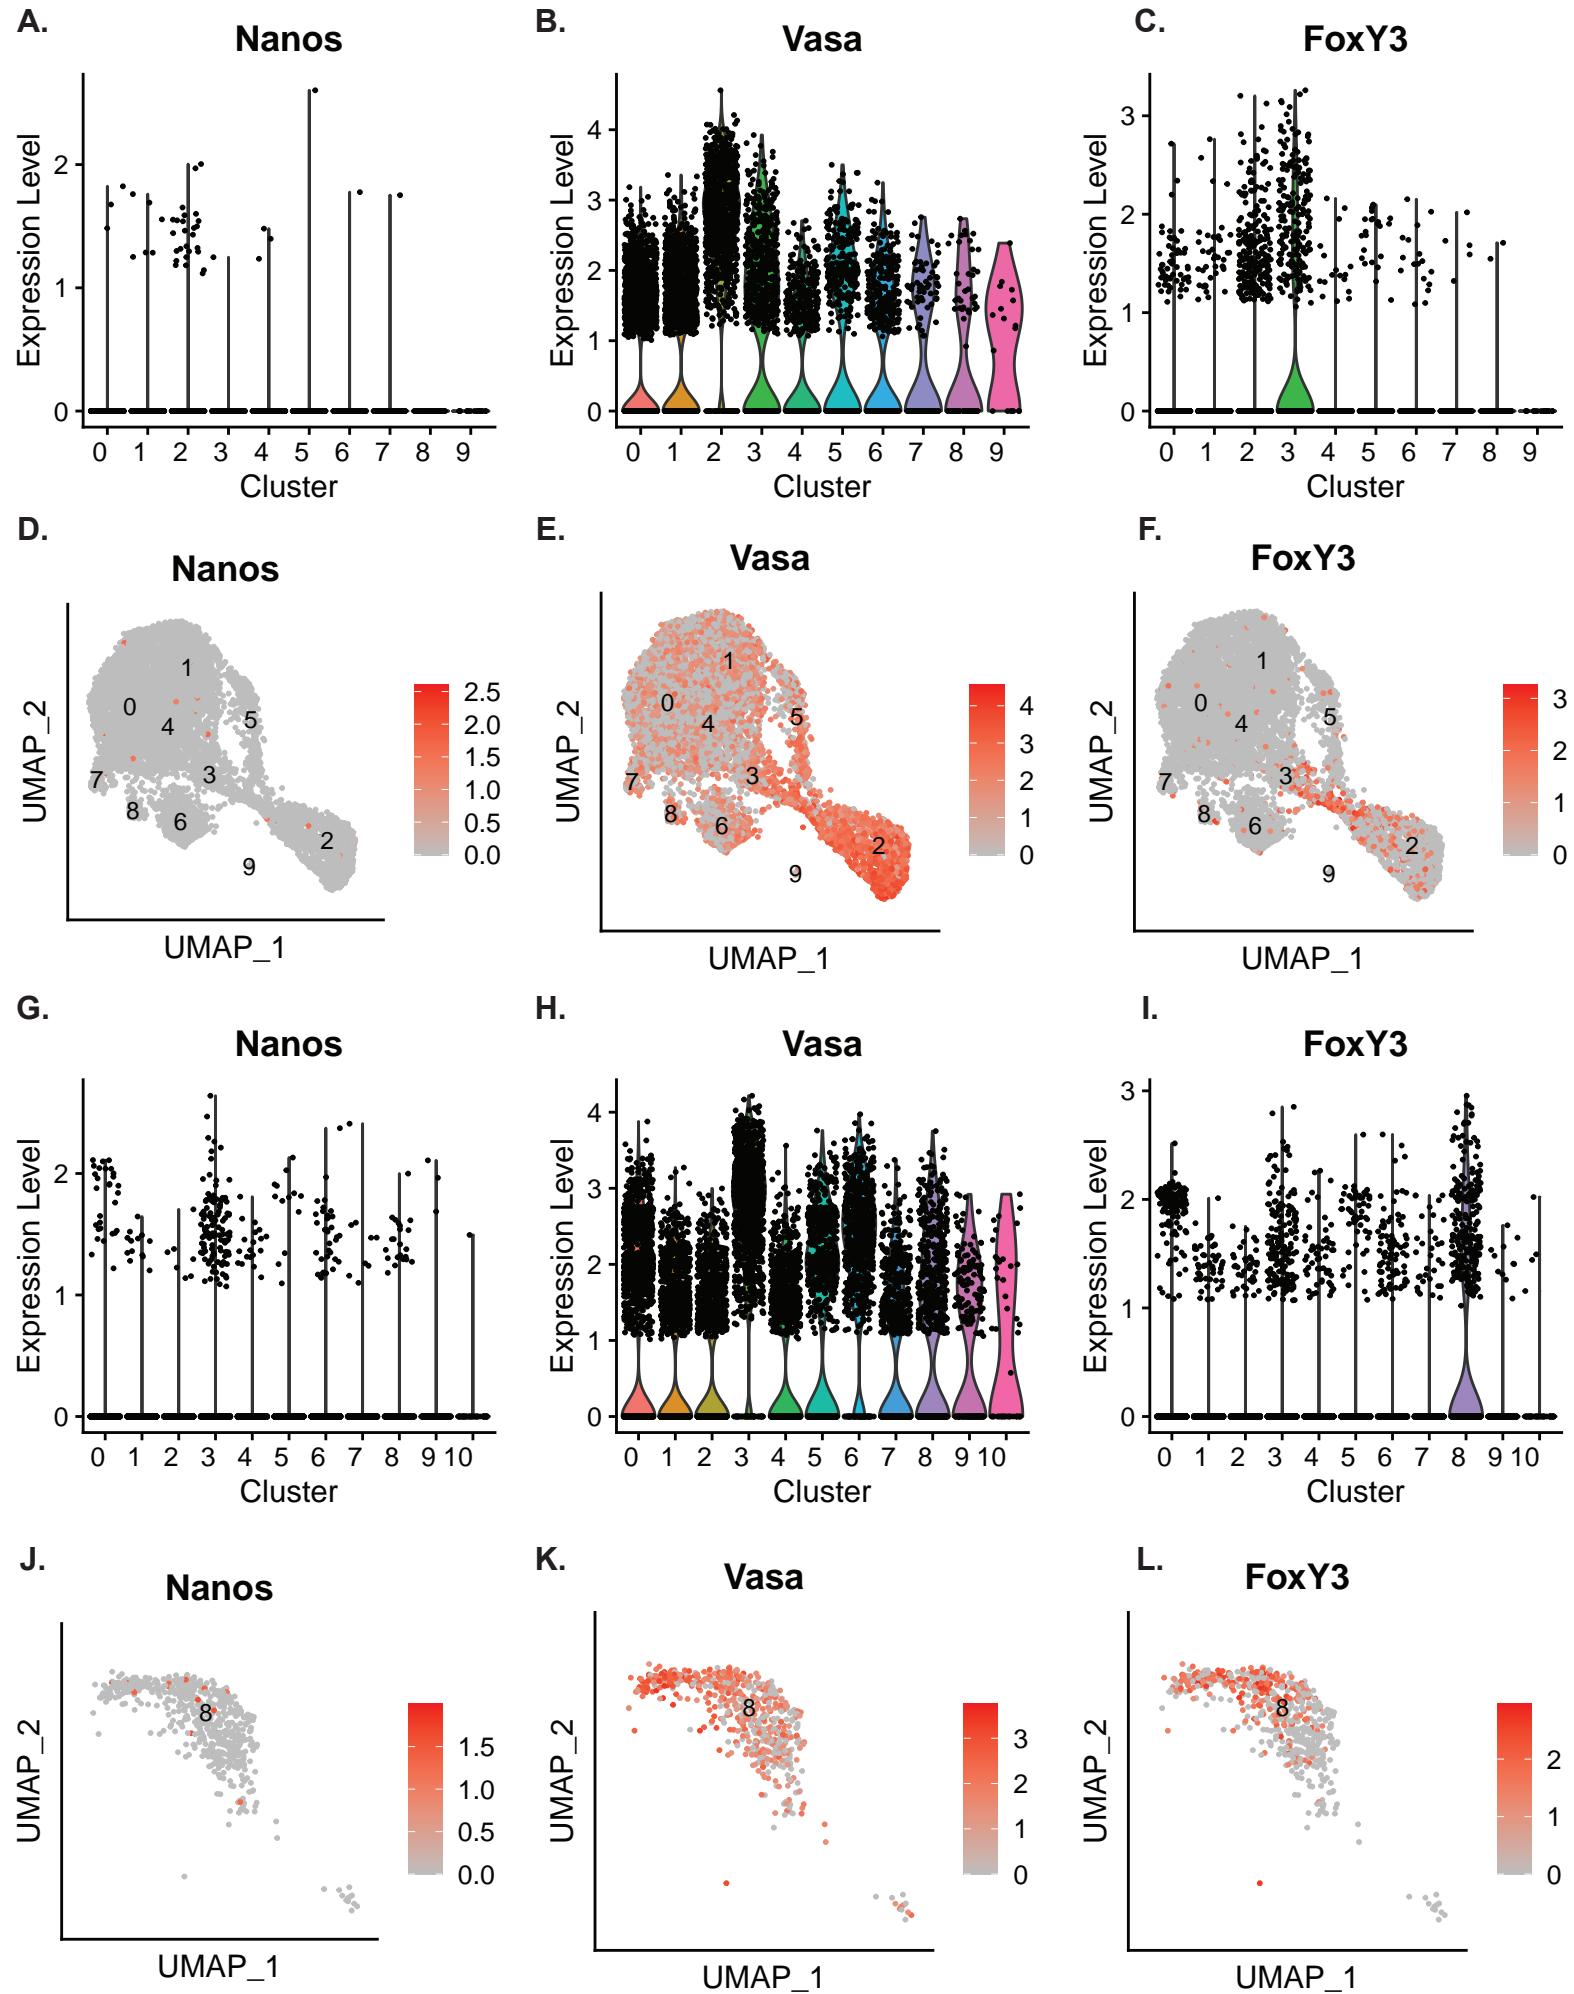

**Fig. S6. Vasa, Nanos, and FoxY3 expression.** Violin plots showing Nanos, Vasa, and FoxY3 expression per cluster in blastula stage (Hibino et al.) and mid-gastrula stage (G-I). Feature plots showing expression of Nanos, Vasa, and FoxY3 in blastula stage (D-F) and in cluster 8 of mid-gastrula stage (J-L).

**A.**

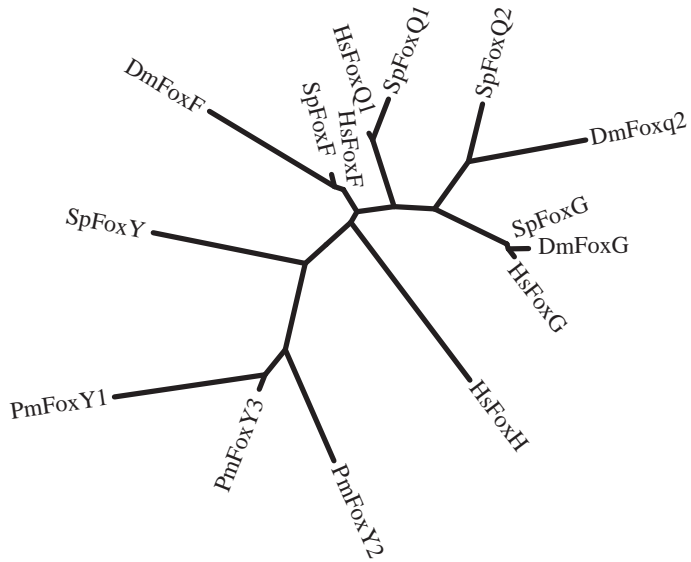

**B.**

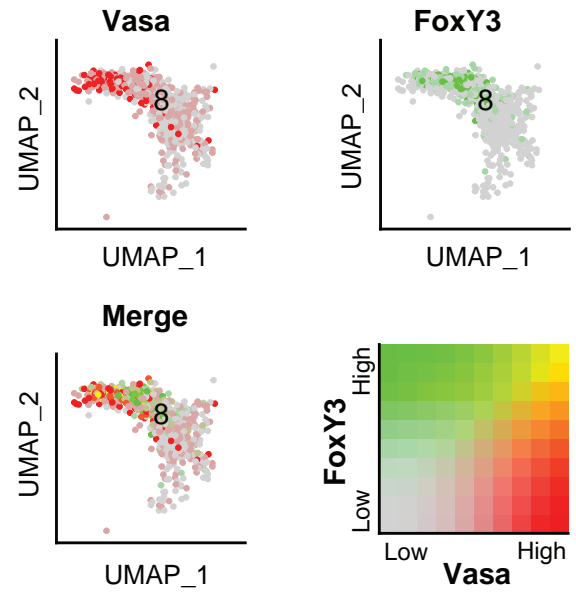

**C.**

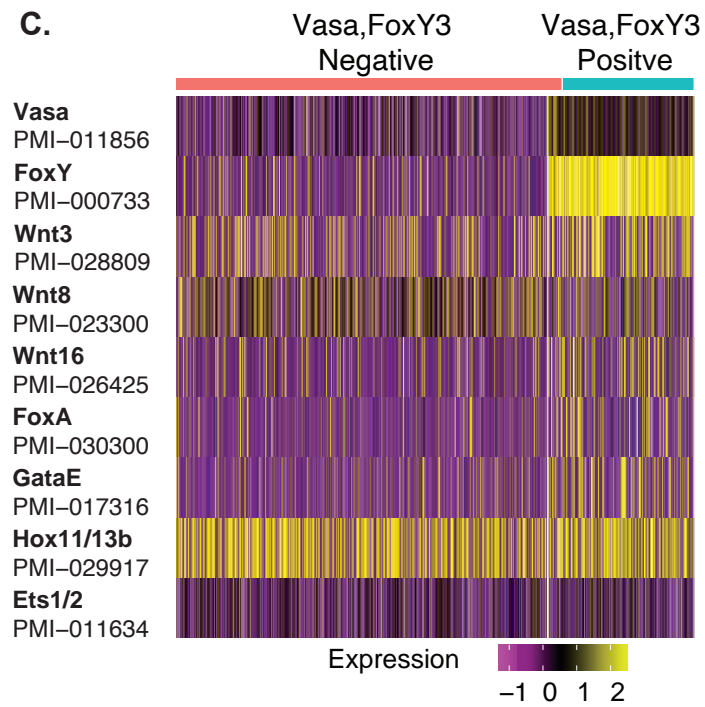

**D.**

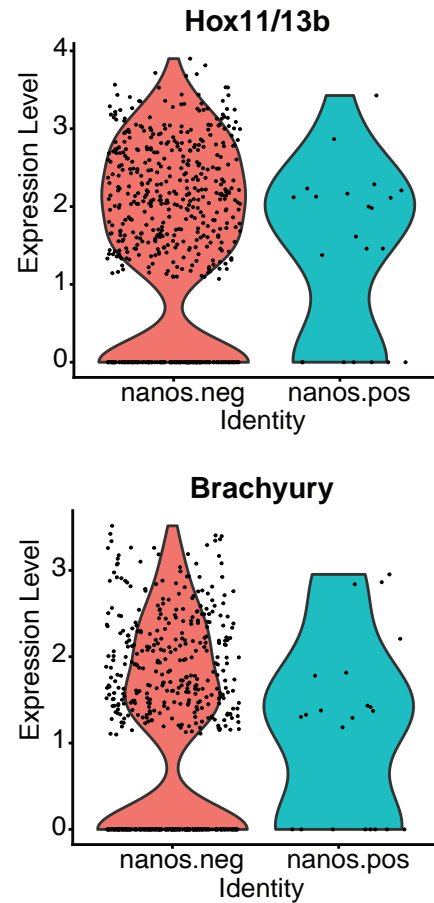

**Fig. S7. Vasa and FoxY3 expression.** (A) Phylogenetic tree of FoxY transcription factors. Pm (*Patiria miniata*), Sp (*Strongylocentrotus purpuratus*), Dm (*Drosophila melanogaster*), Hs (*Homo sapiens*). FoxY3 (PMI\_000733), previously annotated as FoxQ1, was found to be most similar to SpFoxY based on multiple protein sequence alignment. FoxY1 (PMI\_028394). FoxY2 (PMI\_008472). (B) Vasa expression in 395 cells of mid-gastrula cluster 8 (hindgut) shown in red (top left). FoxY3 expression in 221 cells of cluster 8 shown in green (top right). Merge showing co-expression of Vasa and FoxY3 in 167 cells (bottom left). Color scale for expression level (bottom right). (C) Heatmap comparing expression in cells co-expressing Vasa and FoxY3 to those that do not co-express Vasa and FoxY3 in cells of cluster 8 of mid-gastrula stage (hindgut). (D) Violin plot of Hox11/13b and Brachyury expression in Nanos negative and Nanos positive cells of mid-gastrula cluster 8.



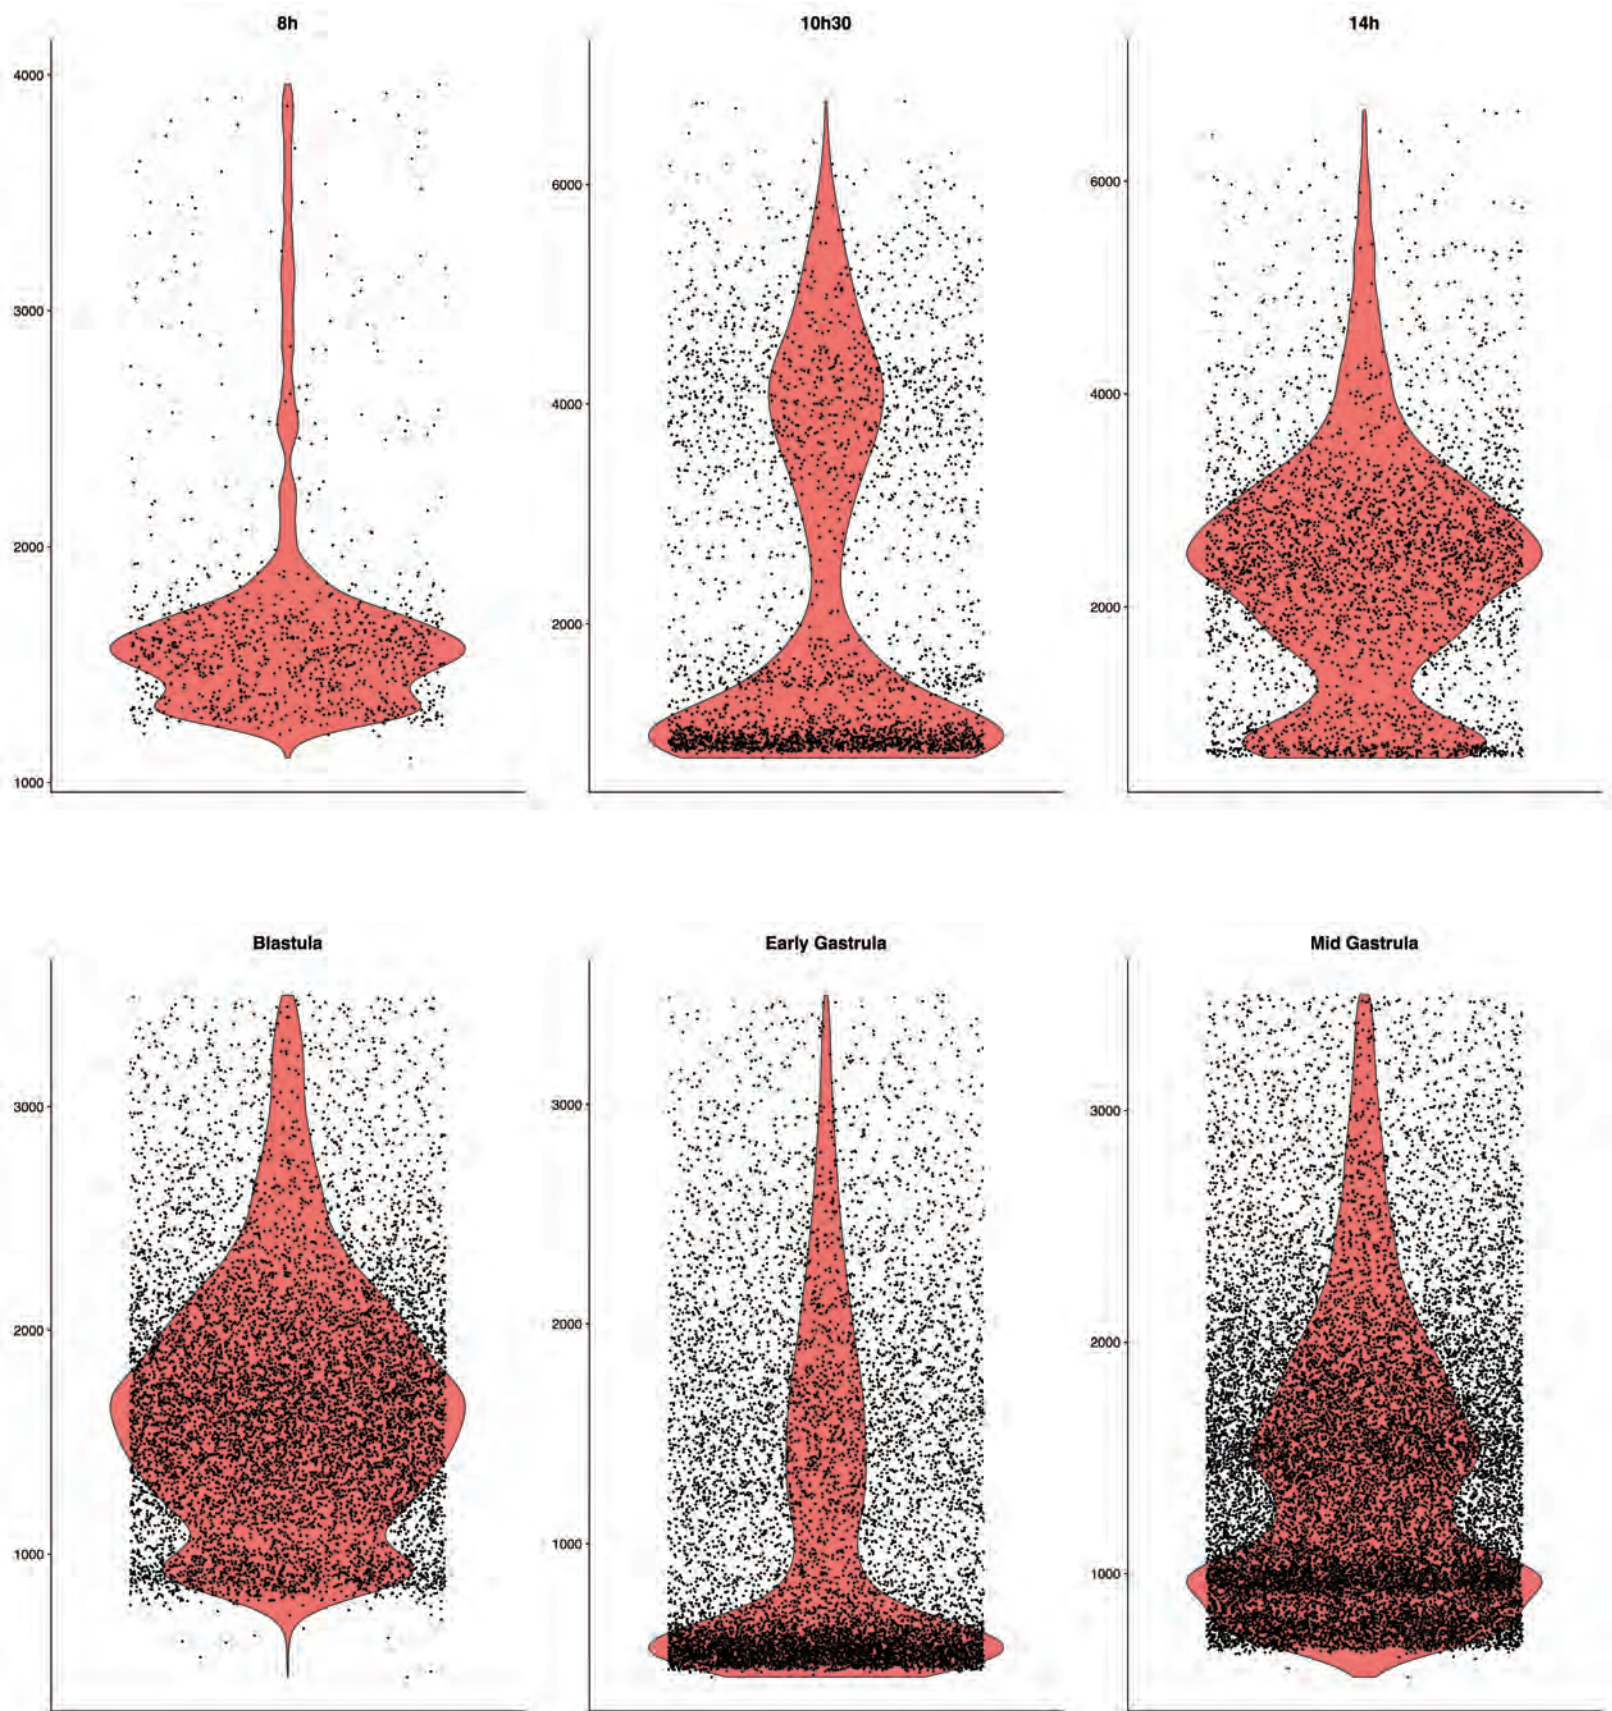

Fig. S8. Total genes detected per cell across developmental time points.



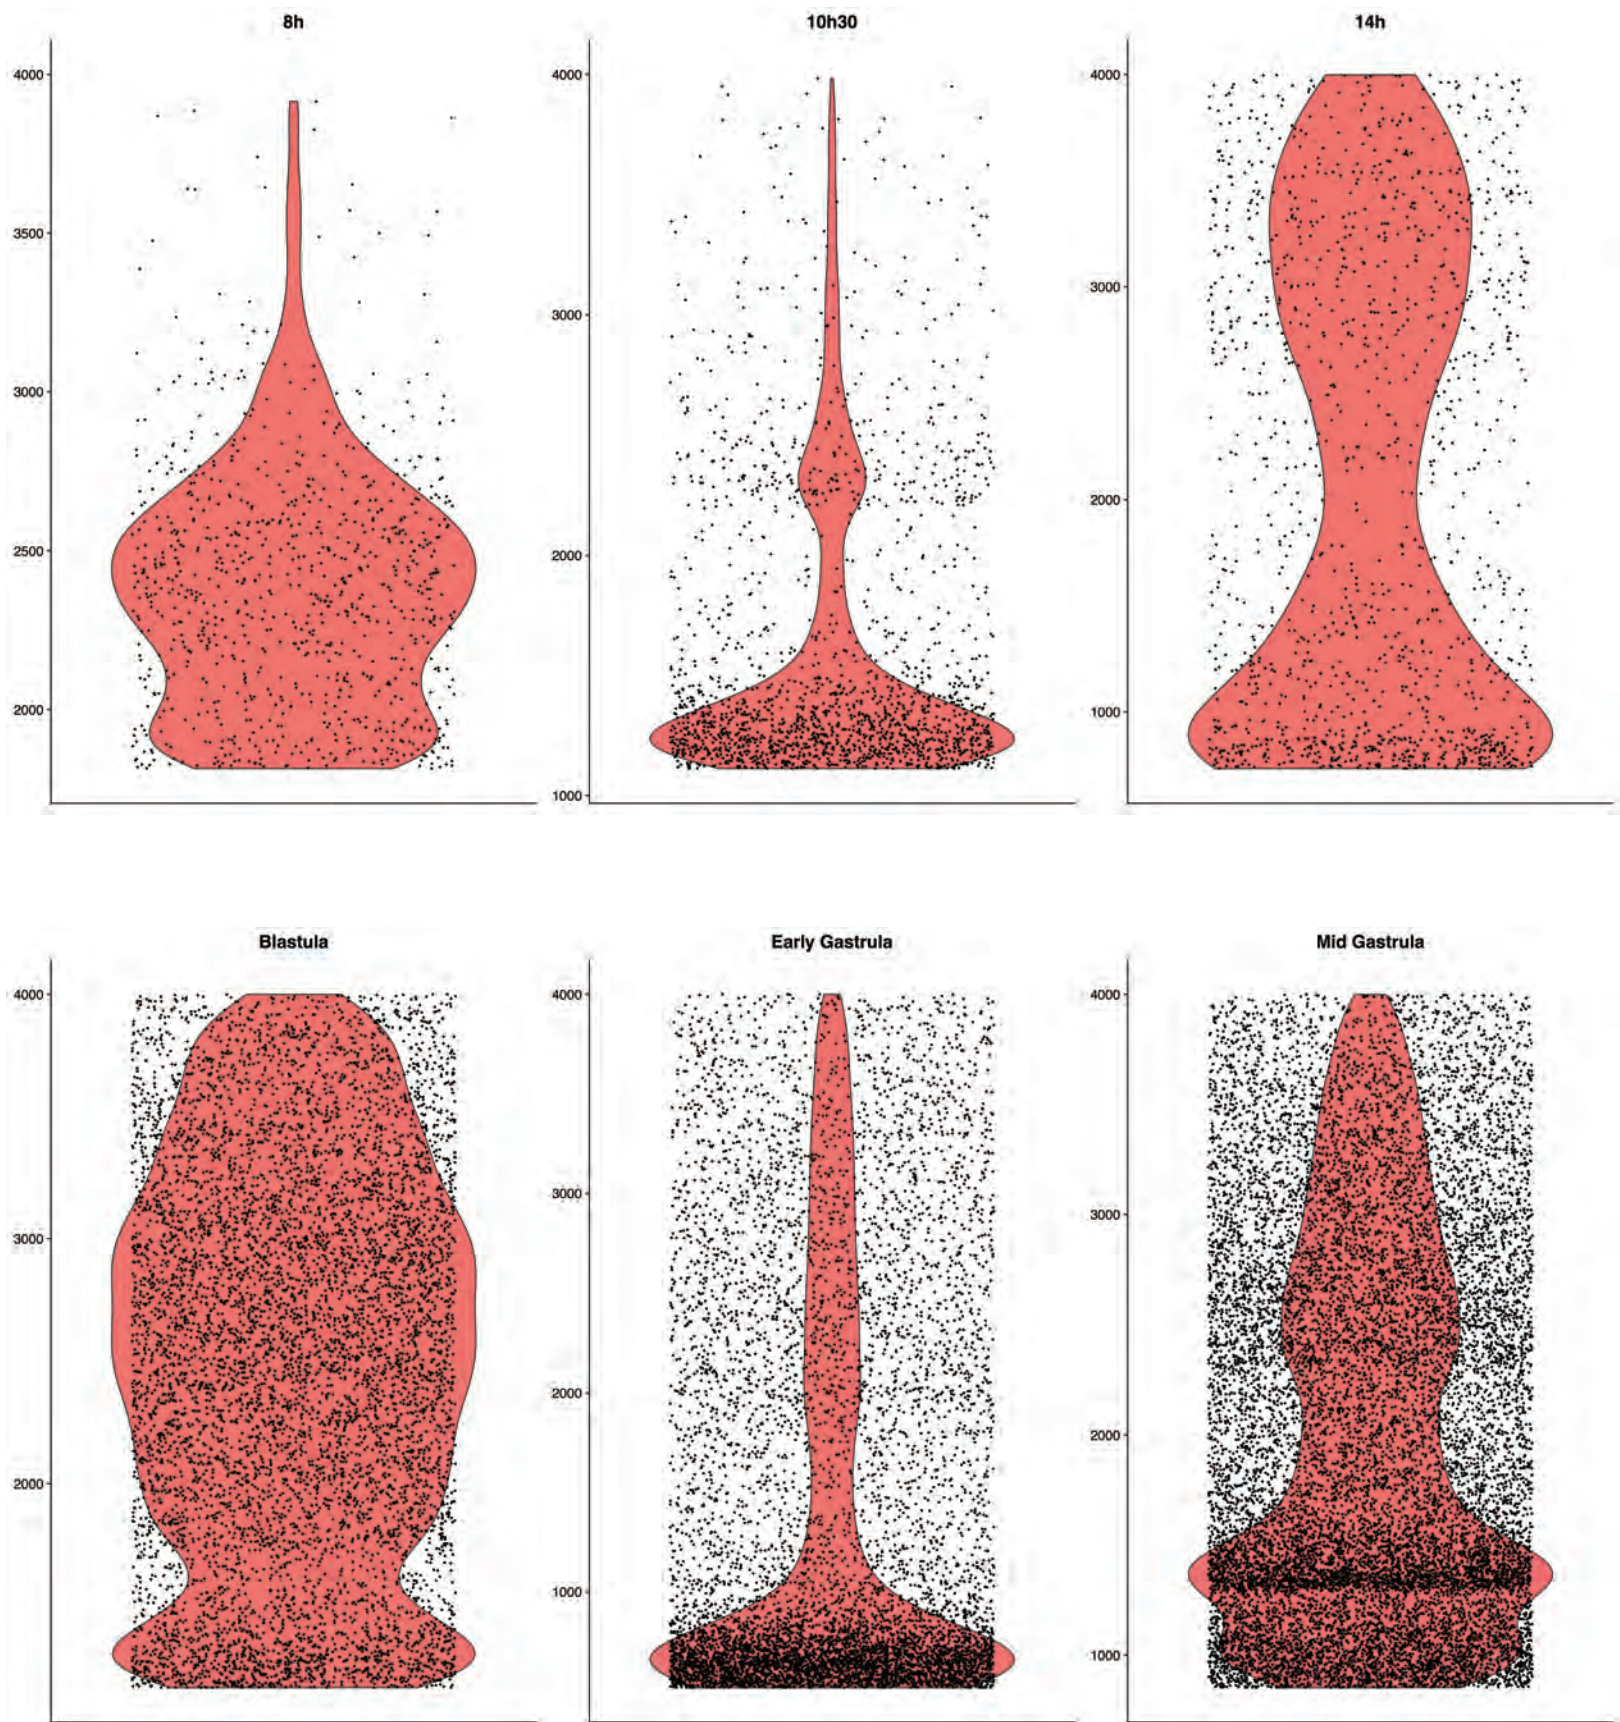

Fig. S9. Total UMIs detected per cell across developmental time points.

**Table S1. Blastula Stage** Cell State Identification and proportion of cells per cluster: 7,272 total cells

|             |                            | Marker gene                                      | Number of cells | Percent of dataset |
|-------------|----------------------------|--------------------------------------------------|-----------------|--------------------|
| Cluster 0 ● | Ectoderm:                  | SoxB1, Dkk3                                      | 2349            | 32.3               |
| Cluster 1 ● | Ectoderm: Apical, Neuronal | FoxQ2, DKK3, Syt14 (synaptotagmin)               | 1528            | 21.0               |
| Cluster 2 ● | Presumptive mesoderm       | Ets1/2, GataE, Tbr, Wnt16,                       | 1006            | 13.8               |
| Cluster 3 ● | Presumptive endoderm       | Cdxl, Bra, Nk1, Wnt8, FoxY3 (annotated as Foxq1) | 695             | 9.5                |
| Cluster 4 ● | Ectoderm: Oral             | Nodal, Lefty, Chordin, Bmp2/4                    | 521             | 7.2                |
| Cluster 5 ● | Ectoderm: Apical pole      | Dkk3, Hyalin                                     | 489             | 6.7                |
| Cluster 6 ● | Ectoderm: Lateral          | Wnt16, Nodal, Lefty                              | 455             | 6.2                |
| Cluster 7 ● | Ectoderm: Vegetal          | Fos1, Mt1-4, Wnt8, Jun                           | 124             | 1.7                |
| Cluster 8 ● | Gcm enriched               | Gcm, Delta                                       | 87              | 1.2                |
| Cluster 9 ● | MifL1 enriched             | MifL1, Mt1-4, Ets4                               | 18              | 0.2                |

**Mid-Gastrula Stage** Cell State Identification and proportion of cells per cluster: 10,448 total cells

|              |                          | Marker gene                                                     | Number of cells | Percent of dataset |
|--------------|--------------------------|-----------------------------------------------------------------|-----------------|--------------------|
| Cluster 0 ●  | Ectoderm                 | SoxB1                                                           | 2407            | 23.0               |
| Cluster 1 ●  | Ectoderm                 | SoxB1, FoxQ2 (PMI-009167 Nkx3.2)                                | 1437            | 13.7               |
| Cluster 2 ●  | Ectoderm: Apical         | Dkk3, FoxQ2                                                     | 1193            | 11.4               |
| Cluster 3 ●  | Mesoderm                 | Ets1/2, Frizz, Vasa                                             | 1143            | 10.9               |
| Cluster 4 ●  | Ectoderm: Lateral        | SoxB1, Wnt8                                                     | 1118            | 10.7               |
| Cluster 5 ●  | Undetermined             | Fic9, Fbn3                                                      | 924             | 8.8                |
| Cluster 6 ●  | Ectoderm: Ventral        | GataE, Wnt16, Blimp1, Vasa, FoxA,                               | 720             | 6.9                |
| Cluster 7 ●  | Ectoderm: Oral           | Nodal, Lefty, Bmp2/4, Nkx2.1                                    | 672             | 6.4                |
| Cluster 8 ●  | Endoderm: Midgut/hindgut | Cdxl, Blimp1, Wnt3, Wnt8, Brachyury, FoxY3 (annotated as Foxq1) | 595             | 5.7                |
| Cluster 9 ●  | Gcm enriched             | Gcm                                                             | 193             | 1.8                |
| Cluster 10 ● | MifL1 enriched           | MifL1, Fos, ribosomal proteins                                  | 46              | 0.4                |

**Table S2. Number of Nanos, Vasa, and FoxY3 expressing cells in cluster 8 (hindgut) and cluster 3 (archenteron) regions.**

|                  | <b>Nanos</b> | <b>Vasa</b> | <b>FoxY3</b> | <b>Nanos,Vasa</b> | <b>Vasa,FoxY3</b> | <b>Nanos,Vasa,FoxY3</b> | <b>Total</b> |
|------------------|--------------|-------------|--------------|-------------------|-------------------|-------------------------|--------------|
| <b>Cluster 8</b> | 22           | 395         | 221          | 21                | 167               | 9                       | 595          |
| <b>Cluster 3</b> | 117          | 1099        | 177          | 112               | 167               | 19                      | 1143         |

**Table S3. Blastula Cluster Markers**

[Click here to download Table S3](#)

**Table S4. MidGastrula Cluster Markers**

[Click here to download Table S4](#)

**Table S5. MG Cluster 8 Vasa Positive**

[Click here to download Table S5](#)

**Table S6. Harmony Cluster Integration Markers**

[Click here to download Table S6](#)

**Supplementary Data 1. PmAnalysis.**

[Click here to download Supplementary Data 1](#)
